# Supplementary material for: Propolis Suppresses UV-Induced Photoaging in Human Skin through Directly Targeting Phosphoinositide 3-Kinase
Source: PubMed Central journal article supplement (PMC7764066; doi:10.3390/nu12123790), 2020-12-10
Supplement: nutrients-12-03790-s001.pdf [file nutrients-12-03790-s001.pdf]

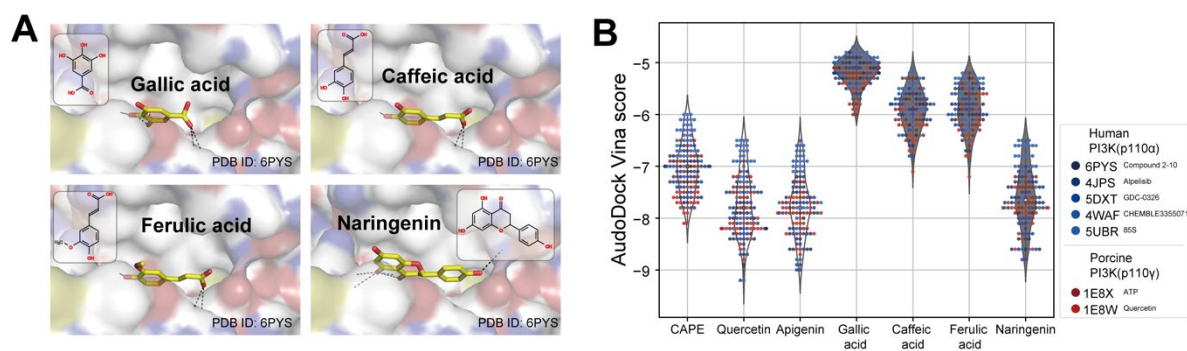

**Figure S1.** Distribution of binding scores. **(A)** The structural models of gallic acid, caffeic acid, ferulic acid, and naringenin on PI3K; **(B)** The distribution of binding scores for each compound against different structures of PI3K. The docking simulations were executed with multiple PI3K structures that were co-crystallized with different inhibitors. The protein data bank identifiers of the PI3Ks and the names of co-crystallized molecules are marked in the legend.
